# Supplementary material for: Coupling next-generation sequencing to dominant positive screens for finding antibiotic cellular targets and resistance mechanisms in Escherichia coli
Source: PubMed Central journal article supplement (PMC5857375; doi:10.1099/mgen.0.000148), 2018-01-10
Supplement: mgen-4-148-s001.pdf [file mgen-4-148-s001.pdf]

## Supplementary Tables

**Table S1.** Sequence reads archive accession numbers for the Plas-Seq samples in this study.

| <b>SRA accession</b> | <b>Sample Number</b> | <b>Sample Name</b> | <b>Sample Type</b> | <b>Organism</b>  | <b>Strain</b> |
|----------------------|----------------------|--------------------|--------------------|------------------|---------------|
| SAMN07833963         | sample1              | CRO_025MIC_R1      | Plas-Seq           | Escherichia coli | ATCC 25922    |
| SAMN07833964         | sample2              | CRO_025MIC_R2      | Plas-Seq           | Escherichia coli | ATCC 25922    |
| SAMN07833965         | sample3              | CRO_05MIC_R1       | Plas-Seq           | Escherichia coli | ATCC 25922    |
| SAMN07833966         | sample4              | CRO_05MIC_R2       | Plas-Seq           | Escherichia coli | ATCC 25922    |
| SAMN07833967         | sample5              | CRO_MIC_R1         | Plas-Seq           | Escherichia coli | ATCC 25922    |
| SAMN07833968         | sample6              | CRO_MIC_R2         | Plas-Seq           | Escherichia coli | ATCC 25922    |
| SAMN07833969         | sample7              | CRO_2MIC_R1        | Plas-Seq           | Escherichia coli | ATCC 25922    |
| SAMN07833970         | sample8              | CRO_2MIC_R2        | Plas-Seq           | Escherichia coli | ATCC 25922    |
| SAMN07833971         | sample9              | TMP_025MIC_R1      | Plas-Seq           | Escherichia coli | ATCC 25922    |
| SAMN07833972         | sample10             | TMP_025MIC_R2      | Plas-Seq           | Escherichia coli | ATCC 25922    |
| SAMN07833973         | sample11             | TMP_05MIC_R1       | Plas-Seq           | Escherichia coli | ATCC 25922    |
| SAMN07833974         | sample12             | TMP_05MIC_R2       | Plas-Seq           | Escherichia coli | ATCC 25922    |
| SAMN07833975         | sample13             | TMP_MIC_R1         | Plas-Seq           | Escherichia coli | ATCC 25922    |
| SAMN07833976         | sample14             | TMP_MIC_R2         | Plas-Seq           | Escherichia coli | ATCC 25922    |
| SAMN07833977         | sample15             | TMP_2MIC_R1        | Plas-Seq           | Escherichia coli | ATCC 25922    |
| SAMN07833978         | sample16             | TMP_2MIC_R2        | Plas-Seq           | Escherichia coli | ATCC 25922    |

|              |          |               |          |                  |            |
|--------------|----------|---------------|----------|------------------|------------|
| SAMN07833979 | sample17 | GEN_025MIC_R1 | Plas-Seq | Escherichia coli | ATCC 25922 |
| SAMN07833980 | sample18 | GEN_025MIC_R2 | Plas-Seq | Escherichia coli | ATCC 25922 |
| SAMN07833981 | sample19 | GEN_05MIC_R1  | Plas-Seq | Escherichia coli | ATCC 25922 |
| SAMN07833982 | sample20 | GEN_05MIC_R2  | Plas-Seq | Escherichia coli | ATCC 25922 |
| SAMN07833983 | sample21 | GEN_MIC_R1    | Plas-Seq | Escherichia coli | ATCC 25922 |
| SAMN07833984 | sample22 | GEN_MIC_R2    | Plas-Seq | Escherichia coli | ATCC 25922 |
| SAMN07833985 | sample23 | GEN_2MIC_R1   | Plas-Seq | Escherichia coli | ATCC 25922 |
| SAMN07833986 | sample24 | GEN_2MIC_R2   | Plas-Seq | Escherichia coli | ATCC 25922 |
| SAMN07833987 | sample25 | LEV_025MIC_R1 | Plas-Seq | Escherichia coli | ATCC 25922 |
| SAMN07833988 | sample26 | LEV_025MIC_R2 | Plas-Seq | Escherichia coli | ATCC 25922 |
| SAMN07833989 | sample27 | LEV_05MIC_R1  | Plas-Seq | Escherichia coli | ATCC 25922 |
| SAMN07833990 | sample28 | LEV_05MIC_R2  | Plas-Seq | Escherichia coli | ATCC 25922 |
| SAMN07833991 | sample29 | LEV_MIC_R1    | Plas-Seq | Escherichia coli | ATCC 25922 |
| SAMN07833992 | sample30 | LEV_MIC_R2    | Plas-Seq | Escherichia coli | ATCC 25922 |
| SAMN07833993 | sample31 | LEV_2MIC_R1   | Plas-Seq | Escherichia coli | ATCC 25922 |
| SAMN07833994 | sample32 | LEV_2MIC_R2   | Plas-Seq | Escherichia coli | ATCC 25922 |
| SAMN07833995 | sample33 | TET_025MIC_R1 | Plas-Seq | Escherichia coli | ATCC 25922 |
| SAMN07833996 | sample34 | TET_025MIC_R2 | Plas-Seq | Escherichia coli | ATCC 25922 |
| SAMN07833997 | sample35 | TET_05MIC_R1  | Plas-Seq | Escherichia coli | ATCC 25922 |

|              |          |              |          |                  |            |
|--------------|----------|--------------|----------|------------------|------------|
| SAMN07833998 | sample36 | TET_05MIC_R2 | Plas-Seq | Escherichia coli | ATCC 25922 |
| SAMN07833999 | sample37 | TET_MIC_R1   | Plas-Seq | Escherichia coli | ATCC 25922 |
| SAMN07834000 | sample38 | TET_MIC_R2   | Plas-Seq | Escherichia coli | ATCC 25922 |
| SAMN07834001 | sample39 | TET_2MIC_R1  | Plas-Seq | Escherichia coli | ATCC 25922 |
| SAMN07834002 | sample40 | TET_2MIC_R2  | Plas-Seq | Escherichia coli | ATCC 25922 |

**Table S2.** List of PCR primers used in this study.

| Gene/Locus of interest      | Primer name (restriction enzyme )  | Sequence (5'-3') (restriction enzyme binding sites in bold)                                                        | Application           |
|-----------------------------|------------------------------------|--------------------------------------------------------------------------------------------------------------------|-----------------------|
| <i>rob</i>                  | rob_FW (KpnI)<br>rob_RV (BamHI)    | <b>GGCGGTACCG</b> ATCGTTACCATTTTTATCTATTACACGAGCAA<br><b>GGCGGATCC</b> TAAACGACGGATCGGAATCAG                       | Subcloning in pZERO-2 |
| <i>ftsI</i>                 | ftsI_FW<br>ftsI_RV                 | ATATGAAAGCAGCGGGCGAAAACGCA<br>TTACGATCTGCCACCTGTCCC                                                                | Subcloning in pZERO-2 |
| <i>marC</i>                 | marC_FW (BamHI)<br>marC_RV         | <b>CACGGATCCA</b> ATTAGTTGCCCTGGCAAGTAATTAGTTGCA<br>TTAATGATACGTTTTAATGATTTCCAGGATGCCG                             | Subcloning in pZERO-2 |
| <i>marA-marB</i>            | marA_FW (BamHI)<br>marB_RV         | <b>CACGGATCCA</b> ATGACGATGTCCAGACGCAATACTGA<br>CTACATAGCGTGTGATTATAATAGGGCACG                                     | Subcloning in pZERO-2 |
| <i>ampC</i>                 | ampC_FW<br>ampC_RV                 | ATATGGGTTTTCTACGGTCTGGCTG<br>TTACTGTAGAGCGTTGAGAATCTGCCAG                                                          | Subcloning in pZERO-2 |
| <i>nlpE</i>                 | nlpE_FW<br>nlpE_RV                 | CACGGATCCAATGGTGA AAAAAGCGATAGTGACAGCG<br>TTACAGCCCCAACTACTGCAATC                                                  | Subcloning in pZERO-2 |
| <i>yebB</i>                 | yebV_FW<br>yebV_RV                 | ATATGGAGAGCACGAAGATGAAAACAGT<br>TCAGGCAAGACGCATAATCCAGG                                                            | Subcloning in pZERO-2 |
| <i>soxS</i>                 | soxS_FW (KpnI)<br>soxS_RV (BamHI)  | <b>GGCGGTACCG</b> ATGTCCCATCAGAAAATTATTCAGGATC<br><b>GGCGGATCC</b> CTACAGGCGGTGGCGATAATC                           | Subcloning in pZERO-2 |
| <i>sdiA</i>                 | sdiA_FW<br>sdiA_RV                 | ATATGCAGGATACGGATTTTTTCAGCTGG<br>TCAAATTAAGCCAGTAGCGGCCG                                                           | Subcloning in pZERO-2 |
| <i>folA</i>                 | folA_FW<br>folA_RV                 | ATATGATCAGTCTGATTGCGGGCTTA<br>TTACCGCCGCTCCAGAATCTCAA                                                              | Subcloning in pZERO-2 |
| <i>rob</i>                  | rob-sgRNA_FW                       | TGACCTTCCAGCCAGATTAAGTTTTAGAGCTAGAAATAGCAAGTTAAAATAAGGC                                                            | CRISPRi               |
| <i>rob</i>                  | rob_sgRNA_mismatch_FW              | TGACCTTCCAGCCAGATTCGGTTTTAGAGCTAGAAATAGCAAGTTAAAATAAGGC                                                            | CRISPRi               |
| Universal RV primer CRISPRi | Universal_RV                       | ACTAGTATTATACCTAGGACTGAGCTAGC                                                                                      | CRISPRi               |
| <i>rob</i>                  | rob_qRT-PCR_FW<br>rob_qRT-PCR_RV   | CCCAGAGCTACTCCTGTTCG<br>TCGTGCCAGA ACTGATAACG                                                                      | qRT-PCR               |
| <i>tuf</i>                  | tuf_FW<br>tuf_RV                   | GTGGGAAGCGAAAATCCTG<br>CCAGTACAGGTAGACTTCTG                                                                        | qRT-PCR               |
| <i>yebV</i>                 | pKD4_yebV_FW<br>pKD4_yebV_RV       | TGCGATCGGACTGGTCGTACCACAACCGGCAGCTAATGTGTAGGCTGGAGCTGCTTC<br>ACAAATAACCCGCATGCCGACGGGTTCTTTTGGACATATGAATATCCTCCTTA | Knock-out             |
| <i>yebV</i>                 | Outside_yebV_FW<br>Outside_yebV_RV | CAGTGGCGGATGATGTATTG<br>CCGGCAGATGTCTTTATGGT                                                                       | Knock-out             |
| <i>yebV</i>                 | Inside_yebV_FW<br>Inside_yebV_RV   | TGGAGAGCACGAAGATGAAA<br>CGGGTACGGTAAAGGACAGA                                                                       | Knock-out             |

**Table S3.** Genomic loci enriched in the Plas-Seq screens.

| Drug | Plasmid | Fold enrichment | Gene start | Gene stop        | Genomic position | Resistant gene entry <sup>#</sup> | Gene name                          | Gene product                                                     | Fold resistance |
|------|---------|-----------------|------------|------------------|------------------|-----------------------------------|------------------------------------|------------------------------------------------------------------|-----------------|
| CRO  | 1       | 102961          | DR76_2592  | DR76_2599        | 2764297..2773353 | DR76_2596                         | <i>ftsI</i>                        | peptidoglycan synthase ftsI                                      | 4x              |
|      | 2       | 985             | DR76_2505  | DR76_2510        | 2666131..2671027 | DR76_2506                         | <i>rob</i>                         | right origin-binding protein                                     | 2x              |
|      | 3       | 491             | DR76_3325  | DR76_3329        | 3540651..3542008 | DR76_3329                         | <i>marC</i> and <i>marRAB</i>      | marC integral membrane protein<br>multiple antibiotic resistance | 2x              |
|      | 3       | 491             | DR76_3325  | DR76_3329        | 3540651..3542008 | DR76_3327/<br>DR76_3326           |                                    |                                                                  | 2x              |
|      | 4       | 281             | DR76_2220  | DR76_2223        | 2375197..2378094 | DR76_2221                         | <i>ampC</i>                        | beta-lactamase                                                   | 2x              |
|      | 5       | 106             | DR76_2706  | DR76_2709        | 2894751..2896439 | DR76_2709                         | <i>nlpE</i>                        | lipoprotein NlpE                                                 | 2x              |
|      | 6       | 1813            | DR76_4206  | DR76_4211        | 4429071..4432380 | Not found                         |                                    |                                                                  |                 |
|      | 7       | 1461            | DR76_1266  | DR76_1270        | 1375105..1377056 | Not found                         |                                    |                                                                  |                 |
|      | 8       | 1089            | DR76_3811  | DR76_3813        | 4013932..4016103 | Not found                         |                                    |                                                                  |                 |
|      | 9       | 603             | DR76_2022  | DR76_2022        | 2155561..2159589 | Not tested                        |                                    |                                                                  |                 |
|      | 10      | 587             | DR76_362   | DR76_364         | 395592..402754   | Not found                         |                                    |                                                                  |                 |
| 11   | 522     | DR76_3446       | DR76_3446  | 3680350..3683874 | DR76_3446        | <i>nifJ</i>                       | pyruvate:ferredoxin oxidoreductase | 1x                                                               |                 |
| GEN  | 1       | 7277            | DR76_3002  | DR76_3009        | 3214843..3222301 | DR76_3007                         | <i>yebV</i>                        | hypothetical protein                                             | 2x              |
|      | 2       | 6206            | DR76_2705  | DR76_2716        | 2894138..2902771 | DR76_2709                         | <i>nlpE</i>                        | lipoprotein NlpE                                                 | 2x              |
|      | 3       | 173             | DR76_84    | DR76_87          | 98222..100813    | Not tested                        |                                    |                                                                  |                 |
|      | 4       | 620             | DR76_465   | DR76_468         | 523193..529716   | Not found                         |                                    |                                                                  |                 |
|      | 5       | 615             | DR76_851   | DR76_853         | 941341..942650   | Not found                         |                                    |                                                                  |                 |
|      | 6       | 385             | DR76_2048  | DR76_2048        | 2186608..2186991 | Not tested                        |                                    |                                                                  |                 |
|      | 7       | 2124            | DR76_1729  | DR76_1731        | 1848740..1853189 | Not found                         |                                    |                                                                  |                 |
|      | 8       | 320             | DR76_1953  | DR76_1953        | 2093599..2094783 | Not tested                        |                                    |                                                                  |                 |
|      | 9       | 335             | DR76_1226  | DR76_1226        | 1..115           | Not tested                        |                                    |                                                                  |                 |
|      | 10      | 1268            | DR76_3560  | DR76_3562        | 3803043..3805411 | Not tested                        |                                    |                                                                  |                 |
|      | 11      | 1142            | DR76_3503  | DR76_3506        | 3742500..3747606 | Not tested                        |                                    |                                                                  |                 |
|      | 12      | 1268            | DR76_1612  | DR76_1616        | 1738833..1741001 | Not tested                        |                                    |                                                                  |                 |
| LEV  | 1       | 330375          | DR76_2505  | DR76_2509        | 2666131..2669603 | DR76_2506                         | <i>rob</i>                         | right origin-binding protein                                     | 2x              |
|      | 2       | 252538          | DR76_2120  | DR76_2124        | 2270218..2276377 | DR76_2121                         | <i>soxS</i>                        | regulatory protein SoxS                                          | 2x              |
|      | 3       | 749             | DR76_526   | DR76_530         | 599986..602843   | Not found                         |                                    |                                                                  |                 |
|      | 4       | 301             | DR76_4346  | DR76_4347        | 4565519..4569012 | Not tested                        |                                    |                                                                  |                 |
|      | 5       | 421             | DR76_256   | DR76_257         | 275709..279004   | Not tested                        |                                    |                                                                  |                 |
|      | 6       | 109             | DR76_3955  | DR76_3957        | 4149845..4153048 | Not tested                        |                                    |                                                                  |                 |
|      | 7       | 451             | DR76_690   | DR76_690         | 766180..767439   | Not tested                        |                                    |                                                                  |                 |
| TET  | 1       | 37626           | DR76_2505  | DR76_2509        | 2666131..2669603 | DR76_2506                         | <i>rob</i>                         | right origin-binding protein                                     | 2x              |
|      | 2       | 20050           | DR76_2120  | DR76_2124        | 2270218..2276377 | DR76_2121                         | <i>soxS</i>                        | regulatory protein SoxS                                          | 2x              |
|      | 3       | 3906            | DR76_2926  | DR76_2932        | 3143332..3149938 | DR76_2929                         | <i>sdiA</i>                        | regulatory protein SdiA                                          | 2x              |
|      | 4       | 228             | DR76_764   | DR76_764         | 848552..849955   | Not tested                        |                                    |                                                                  |                 |
|      | 5       | 296             | DR76_937   | DR76_937         | 1035386..1037077 | Not tested                        |                                    |                                                                  |                 |
|      | 6       | 427             | DR76_1953  | DR76_1953        | 2093599..2094783 | Not tested                        |                                    |                                                                  |                 |
|      | 7       | 169             | DR76_148   | DR76_151         | 155500..163092   | Not tested                        |                                    |                                                                  |                 |
|      | 8       | 1235            | DR76_4795  | DR76_4795        | 5072602..5074038 | Not tested                        |                                    |                                                                  |                 |
|      | 9       | 132             | DR76_3676  | DR76_3681        | 3914999..3918737 | Not tested                        |                                    |                                                                  |                 |

|     |    |        |           |           |                  |            |             |                              |     |
|-----|----|--------|-----------|-----------|------------------|------------|-------------|------------------------------|-----|
|     | 10 | 127    | DR76_4370 | DR76_4372 | 4589862..4591389 | Not tested |             |                              |     |
|     | 11 | 879    | DR76_470  | DR76_470  | 530256..533155   | Not tested |             |                              |     |
|     | 12 | 848    | DR76_676  | DR76_676  | 751405..751481   | Not tested |             |                              |     |
|     | 13 | 169    | DR76_923  | DR76_923  | 1021553..1021852 | Not tested |             |                              |     |
|     | 14 | 371    | DR76_2044 | DR76_2044 | 2181525..2183057 | Not tested |             |                              |     |
| TMP | 1  | 406354 | DR76_2556 | DR76_2564 | 2722303..2729487 | DR76_2559  | <i>folA</i> | dihydrofolate reductase      | 16x |
|     | 2  | 187    | DR76_2507 | DR76_2508 | 2666704..2668901 | DR76_2506  | <i>rob</i>  | right origin-binding protein | 1x  |
|     | 3  | 244    | DR76_690  | DR76_690  | 766180..767439   | Not tested |             |                              |     |
|     | 4  | 840    | DR76_2724 | DR76_2724 | 2910603..2910716 | Not tested |             |                              |     |

# The gene responsible for resistance is indicated. Not found, the plasmid could not be isolated from the plasmid pool; Not tested, the plasmid was not tested for resistance.

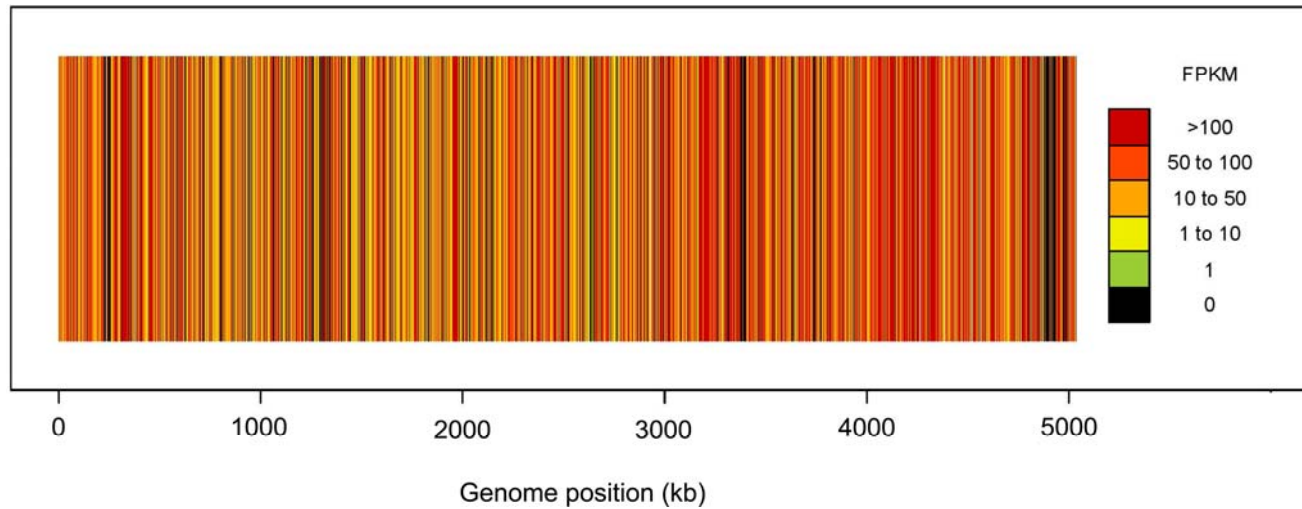

**Figure S1.** Baseline coverage of the *E.coli* plasmid library. The plasmid library was electroporated in *E.coli* TOP10 and grown for one passage before plasmids were extracted and sequenced. The chromosome map indicates the abundance of each gene expressed as fragments per kilobase per million fragments mapped (FPKM). Colored bars indicate the abundance of individual genes.

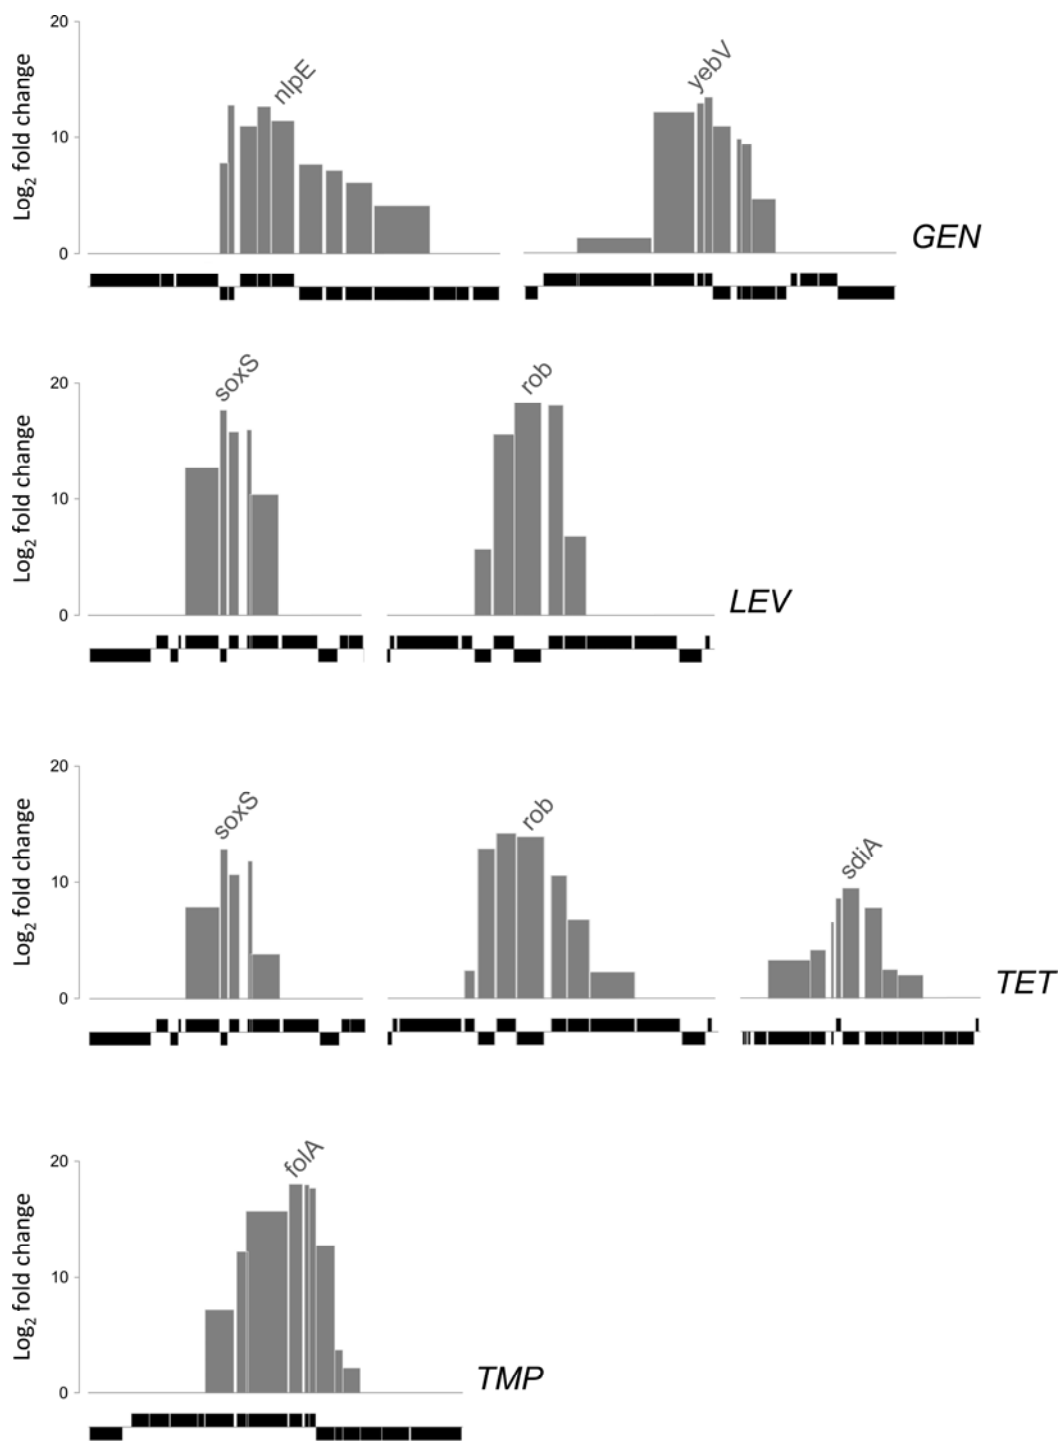

**Figure S2.** Gene enrichment for each plasmid enriched after gentamicin (GEN), levofloxacin (LEV), tetracycline (TET), and trimethoprim (TMP) selection that were functionally characterized. Log<sub>2</sub>-transformed maximal variation in abundance compared to the non-



treated baseline is shown. For each plasmid, the gene responsible for the resistance phenotype is indicated. Gray bars represent enriched genes. Black bars underneath represent operons (each box corresponding to a gene) surrounding the enriched loci.
